# Supplementary material for: The ionic liquid [C4mpy][Tf2N] induces bound-like structure in the intrinsically disordered protein FlgM
Source: Royal Society of Chemistry journal article supplement (doi:10.1039/c9cp01882d), 2019-01-01
Supplement: c9cp01882d1.pdf [file c9cp01882d1.pdf]

**Supplementary Information For**  
**The Ionic Liquid [C<sub>4</sub>mpy][Tf<sub>2</sub>N] Induces Bound-like Structure in the Intrinsically Disordered Protein FlgM**

Erin E. Carter,<sup>a</sup> Alexandra J. Heyert,<sup>a</sup> Mattheus De Souza,<sup>c</sup> Joseph L. Baker,<sup>c</sup> and Gerrick E. Lindberg<sup>a,b,\*</sup>

a. Department of Chemistry and Biochemistry, Northern Arizona University, Flagstaff, AZ

b. Center for Materials Interfaces in Research and Applications, Northern Arizona University, Flagstaff, AZ

c. Department of Chemistry, The College of New Jersey, Ewing, NJ

\*Email contact: gerrick.lindberg@nau.edu

**Table S1:** List of all simulations, including the system, temperatures considered, number of system replicates, and length of simulation

| System                                      | Temperature(s) | Number of Replicates | Simulation Length |
|---------------------------------------------|----------------|----------------------|-------------------|
| FlgM bound to $\sigma^{28}$ with 0 IL pairs | 300 K<br>358 K | 1<br>1               | 200 ns            |
| FlgM with 0 IL pairs                        | 300 K<br>358 K | 2<br>2               | 200 ns            |
| FlgM with 10 IL pairs                       | 300 K<br>358 K | 2<br>2               | 200 ns            |
| FlgM with 20 IL pairs                       | 300 K<br>358 K | 2<br>2               | 200 ns            |
| FlgM with 30 IL pairs                       | 300 K<br>358 K | 2<br>2               | 200 ns            |
| FlgM with 40 IL pairs                       | 300 K<br>358 K | 2<br>2               | 200 ns            |
| FlgM with 50 IL pairs                       | 300 K<br>358 K | 2<br>2               | 200 ns            |
| 50 IL pairs in water                        | 300 K          | 1                    | 200 ns            |

**Table S2:** Residue numbers and naming scheme for the FlgM helix subsystems isolated from the 1SC5 PDB file

| <b>System</b> | <b>Residues</b> | <b>Length</b> |
|---------------|-----------------|---------------|
| Helix 1 (H1)  | 3 - 24          | 22            |
| Helix 2 (H2)  | 34 - 50         | 17            |
| Helix 3 (H3)  | 50 - 71         | 22            |
| Helix 4 (H4)  | 73 - 88         | 16            |
